# Supplementary material for: Aluminum based sulfide solid lithium ionic conductors for all solid state batteries
Source: Royal Society of Chemistry journal article supplement (doi:10.1039/c4nr00804a), 2014-01-01
Supplement: c4nr00804a1.pdf [file c4nr00804a1.pdf]

### Supporting information

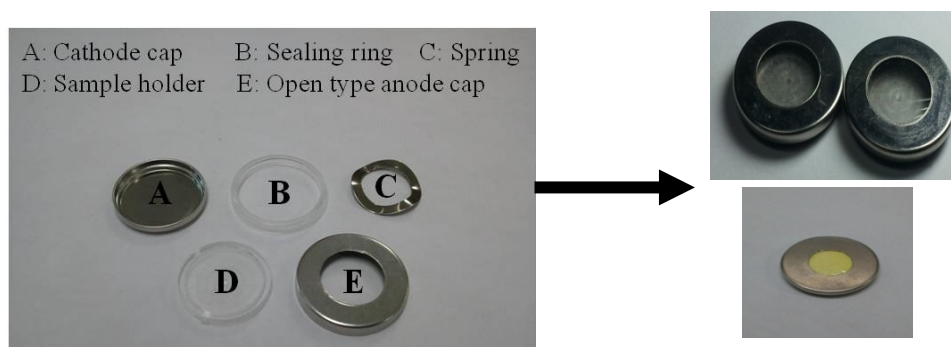

**Figure S1:** Components used for analyzing X-ray diffraction of thio-LICISON samples. The open type anode cap was covered with X-ray film (Mylar, XF-125, USA) resulting in the reflections of the sample holder at  $26^\circ$ ,  $44^\circ$  and  $52^\circ$  in the X-ray diffraction pattern.

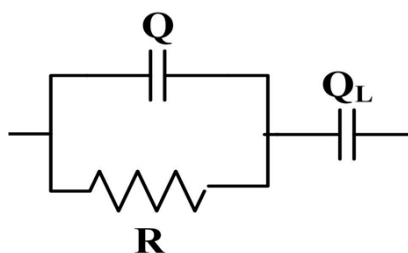

**Figure S2:** Equivalent circuit model for fitting the impedance plots obtained during ionic conductivity measurement. The R and Q represent the resistance and constant phase elements. The  $Q_L$  denotes the low frequency tail of the impedance plot.<sup>S1</sup>

S1 H. Xie, J. B. Goodenough and Y. Lib, *J. Power Sources*, 2011, **196**, 7760-7762.
